# Supplementary material for: Structure of scavenger receptor SCARF1 and its interaction with lipoproteins
Source: eLife journal article supplement (doi:10.7554/elife.93428), 2024-02-07
Supplement: fig2-figsupp2-data2 [file elife-93428-fig2-figsupp2-data2-v1.zip]

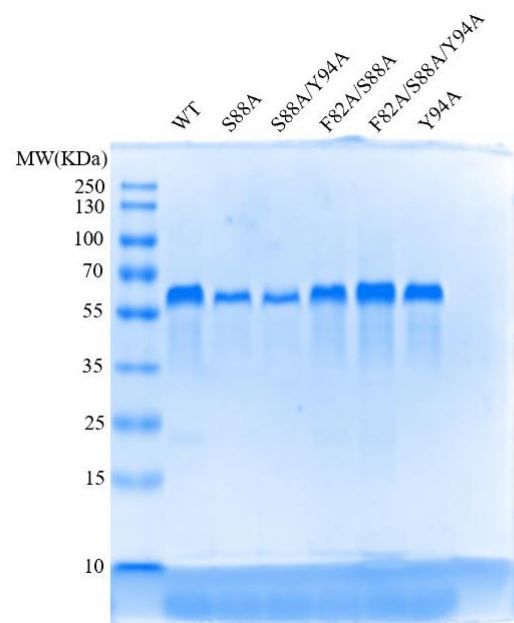

**Figure 2-figure supplement 2-source data 2.** Original gel corresponding to Figure 2-figure supplement 2, panel A. Lane 4 (F82A/S88A) is not shown in Figure 2-figure supplement 2.
